# Supplementary material for: Enabling efficient visible light photocatalytic water splitting over SrTaO2N by incorporating Sr in its B site
Source: Royal Society of Chemistry journal article supplement (doi:10.1039/c8ta06934d), 2018-01-01
Supplement: c8ta06934d1.pdf [file c8ta06934d1.pdf]

## Supplementary Information

### Enabling Efficient Visible Light Photocatalytic Water Splitting over SrTaO<sub>2</sub>N by incorporating Sr at B site

Xiaoqin Sun<sup>a</sup>, Fangfang Wu<sup>a</sup>, Gang Liu<sup>b</sup> and Xiaoxiang Xu<sup>a,\*</sup>

*<sup>a</sup>Shanghai Key Lab of Chemical Assessment and Sustainability, School of Chemical  
Science and Engineering, Tongji University, 1239 Siping Road, Shanghai, 200092,  
China, \*Email: [xxxu@tongji.edu.cn](mailto:xxxu@tongji.edu.cn), telephone: +86-21-65986919*

*<sup>b</sup>Shenyang National laboratory for Materials Science, Institute of Metal Research,  
Chinese Academy of Science, 72 Wenhua Road, Shenyang 110016, China*

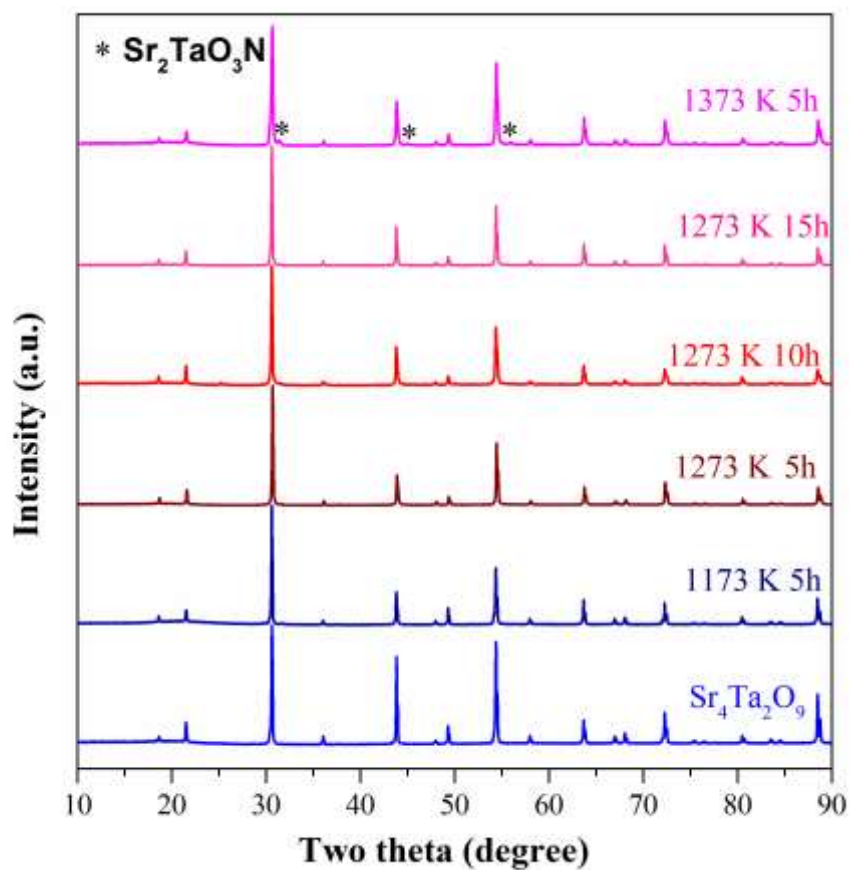

Figure S1. X-ray powder diffraction patterns of Sr<sub>4</sub>Ta<sub>2</sub>O<sub>9</sub> ammonolyzed at different temperatures and duration time, pristine Sr<sub>4</sub>Ta<sub>2</sub>O<sub>9</sub> is also included for comparisons.

Impurity reflections are indicated by asterisk (\*).

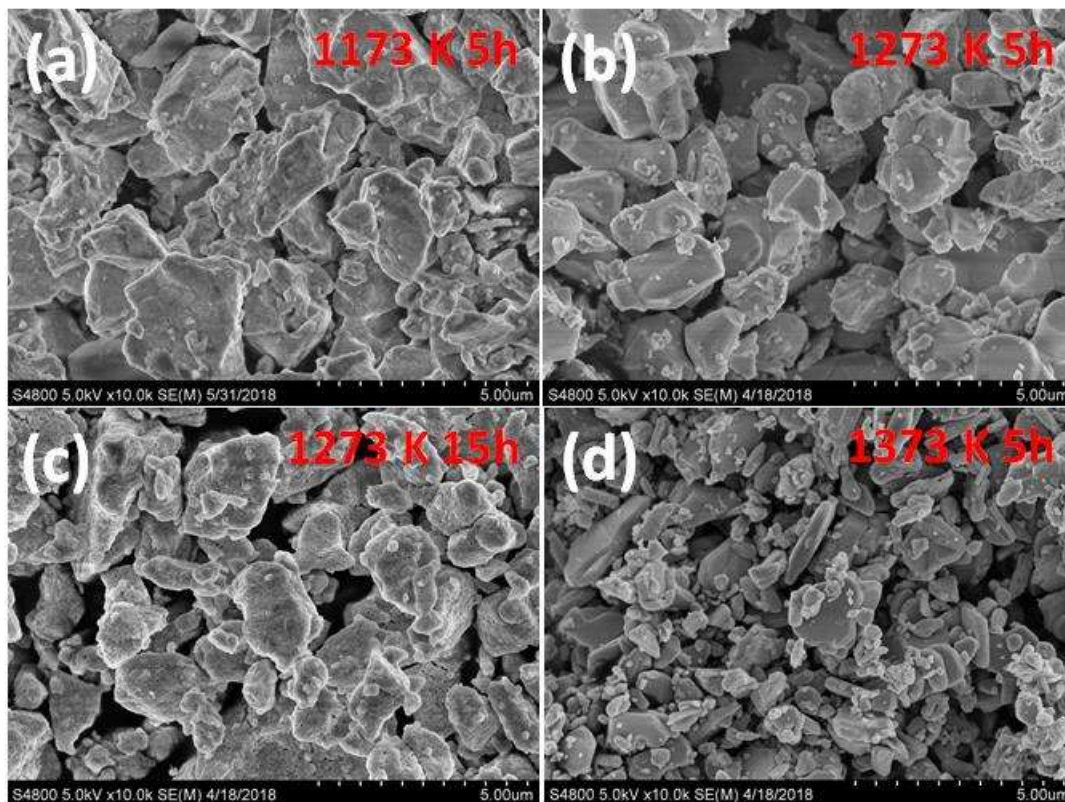

Figure S2. Field emission scanning electron microscopy images of  $\text{Sr}_4\text{Ta}_2\text{O}_9$  ammonolyzed at different temperatures and duration time: (a) 1173 K 5h, (b) 1273 K 5 h, (c) 1273 K 15 h, and (d) 1373 K 5 h.

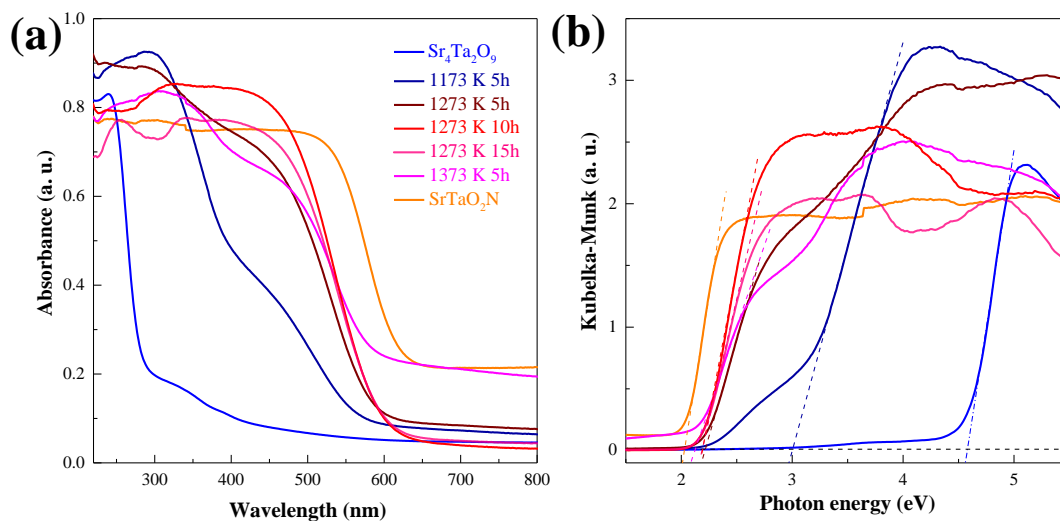

Figure S3. (a) UV-vis absorption spectra (converted from diffuse reflectance spectra) of  $\text{Sr}_4\text{Ta}_2\text{O}_9$  ammonolyzed at different temperatures and duration time; (b) Kubelka-Munk transformation of diffuse reflectance data, band gap values are determined by extrapolating the linear part of the curves down to energy axis.

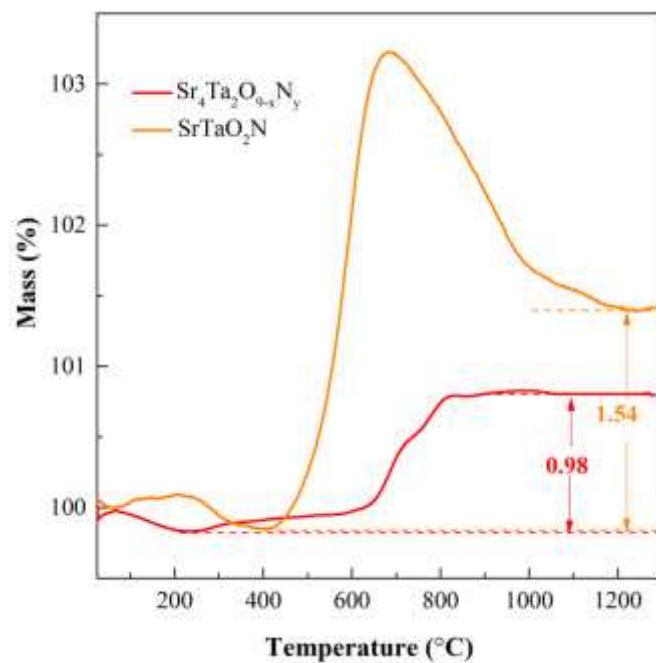

Figure S4. TGA curves of  $\text{Sr}_4\text{Ta}_2\text{O}_{9-x}\text{N}_y$  and  $\text{SrTaO}_2\text{N}$  in air with a heating rate of  $10 \text{ K min}^{-1}$

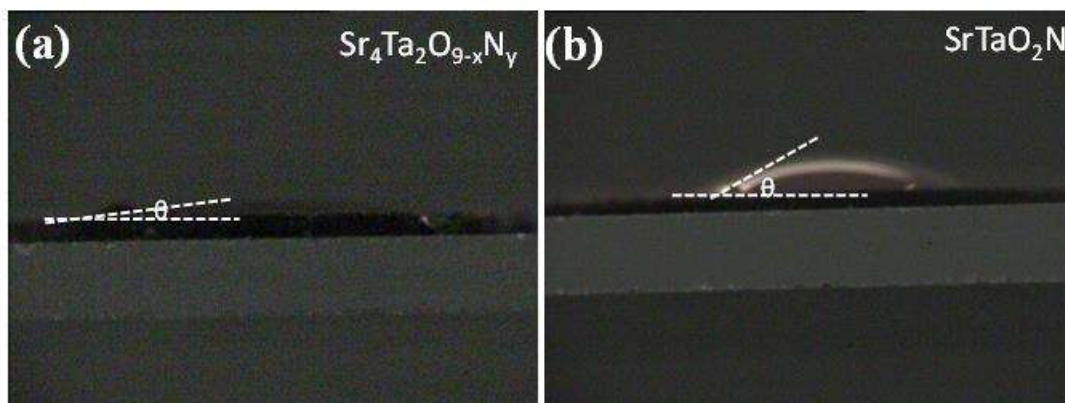

Figure S5. The dynamic contact angles of distilled water drop on pellets pressed by freshly prepared samples: (a)  $\text{Sr}_4\text{Ta}_2\text{O}_{9-x}\text{N}_y$  and (b)  $\text{SrTaO}_2\text{N}$ .

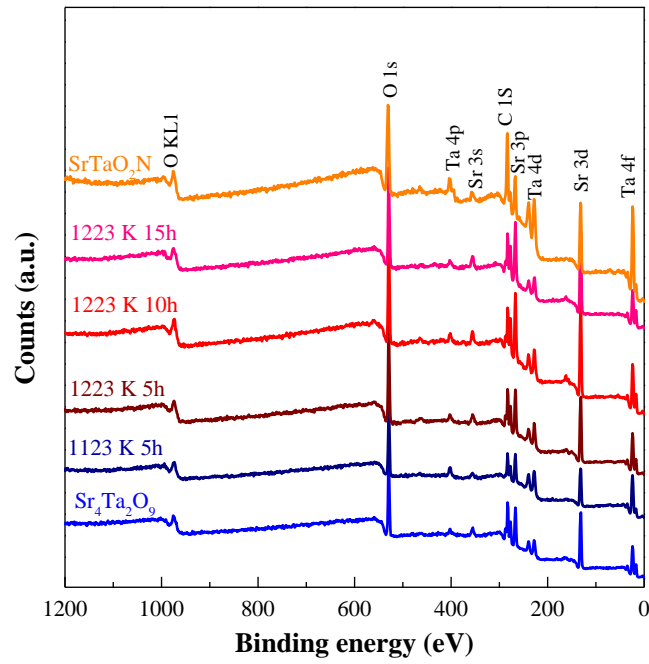

Figure S6. XPS survey spectra of all samples.

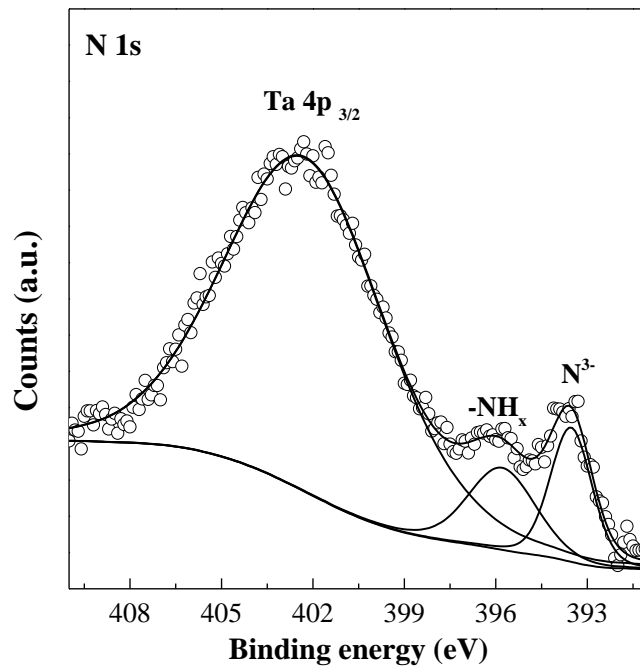

Figure S7. X-ray photoelectron spectra of N 1s state after *in situ* Ar ion sputtering Sr<sub>4</sub>Ta<sub>2</sub>O<sub>9-x</sub>N<sub>y</sub> with beam energy of 4 keV for 150 s.

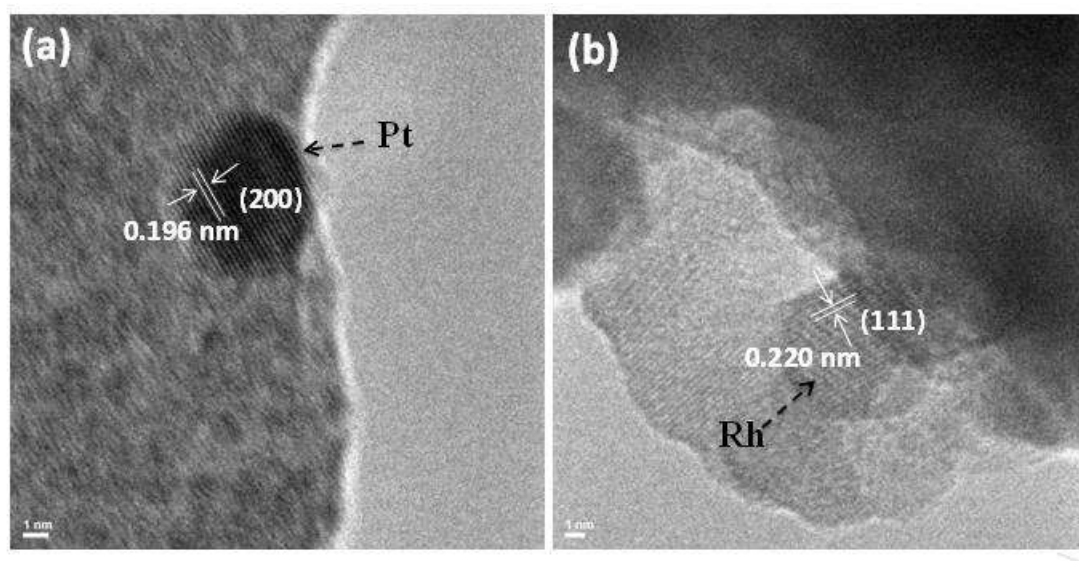

Figure S8. High resolution transmission electron microscopy (TEM) images of  $\text{Sr}_4\text{Ta}_2\text{O}_{9-x}\text{N}_y$  loaded with Pt (a) and Rh@Rh<sub>2</sub>O<sub>3</sub> (b).

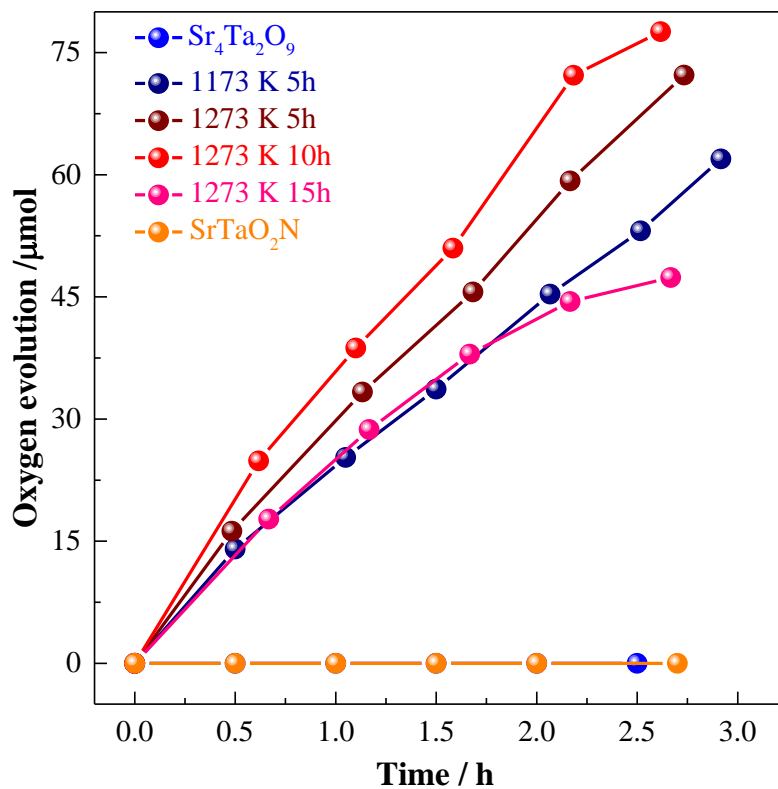

Figure S9. Photocatalytic oxygen production of  $\text{Sr}_4\text{Ta}_2\text{O}_9$  ammonolyzed at different temperatures and duration time in the presence of silver nitrate aqueous solution (0.05 M), 1 wt%  $\text{Rh}@\text{Rh}_2\text{O}_3$  was loaded as the cocatalyst



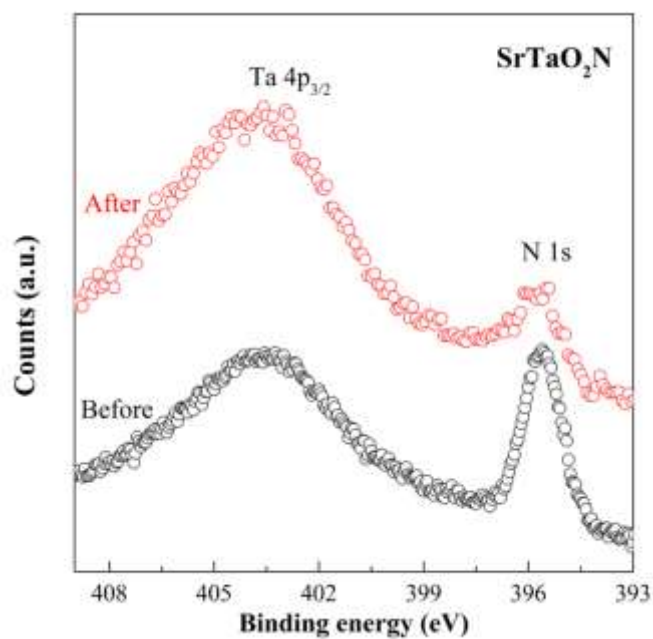

Figure S10. X-ray photoelectron spectroscopy (XPS) of N 1s state for SrTaO<sub>2</sub>N before and after photocatalytic reaction.

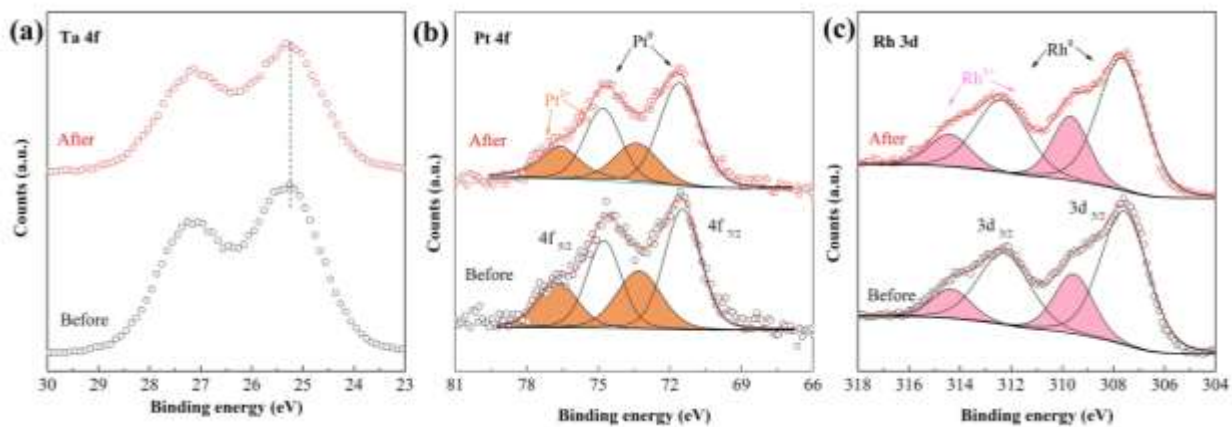

Figure S11. X-ray photoelectron spectroscopy (XPS) of Sr<sub>4</sub>Ta<sub>2</sub>O<sub>9-x</sub>N<sub>y</sub> before and after photocatalytic reaction: (a) Ta 4f state, (b) Pt 4f state, and (c) Rh 3d state, respectively.

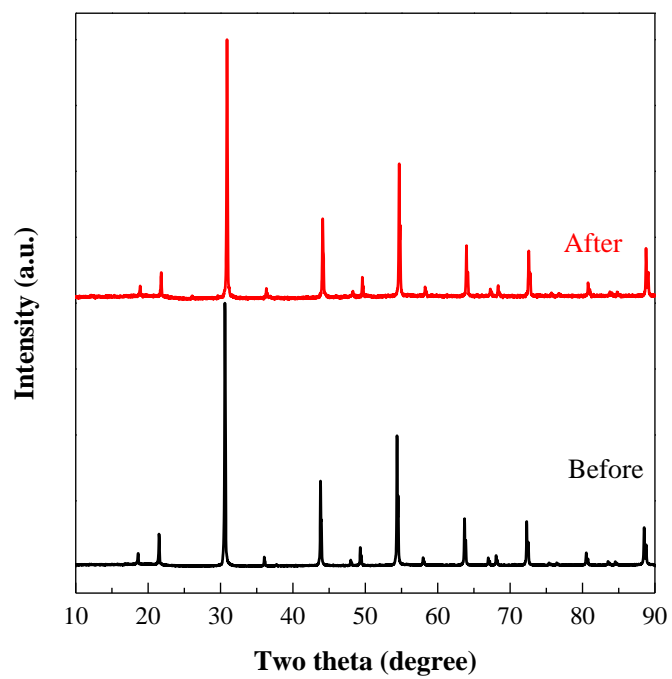

Figure S12. X-ray powder diffraction patterns of  $\text{Sr}_4\text{Ta}_2\text{O}_{9-x}\text{N}_y$  before and after photocatalytic reactions.

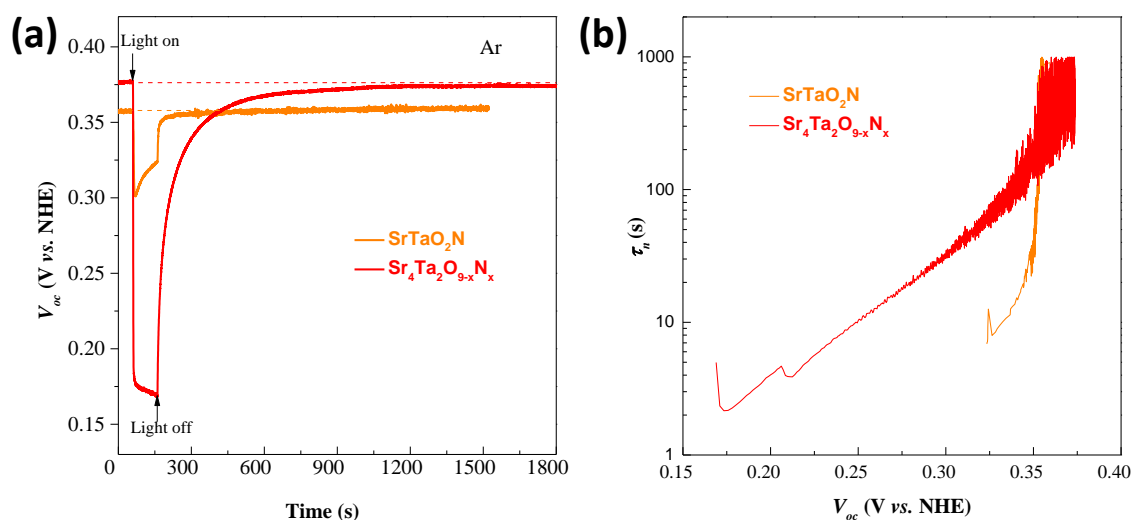

Figure S13. (a)  $V_{oc}$  time profile of SrTaO<sub>2</sub>N and Sr<sub>4</sub>Ta<sub>2</sub>O<sub>9-x</sub>N<sub>y</sub> in Ar atmosphere, illumination ( $\lambda \geq 400$  nm) started after a steady  $V_{oc}$  was achieved in the dark and was terminated after 100 s, (b) electron lifetime derived from Equation S1 (see information below).

Open-circuit voltage decay (OCVD) experiments can be used to evaluate the charge separation conditions inside a semiconductor and electron lifetime. The steady state  $V_{oc}$  in the dark is immediately dropped down upon light illumination due to consumption of photo-generated holes at the semiconductor surface and simultaneous accumulation of photo-generated electrons<sup>1</sup>. This negatively shifts Fermi level of semiconductors as well as  $V_{oc}$ . Instantaneously removing illumination of photo-electrodes results in decay of  $V_{oc}$  which is governed by various electron dissipation pathways (e.g. recombined with trapped holes, etc.). This provides a direct evaluation of charge separation situations inside semiconductors. The lifetime of these accumulated electrons can be quantitatively approximated using the following

equation<sup>2</sup>:

$$\tau_n = \frac{k_B T}{e} \left( \frac{dV_{oc}}{dt} \right)^{-1} \quad (S1)$$

where  $\tau_n$  is potential dependent lifetime,  $k_B$  is Boltzmann's constant,  $T$  is the temperature in K and  $e$  is the elementary charge.  $\text{Sr}_4\text{Ta}_2\text{O}_{9-x}\text{N}_y$  shows a much slower  $V_{oc}$  decay profile and a much longer electron lifetime compared to  $\text{SrTaO}_2\text{N}$ , which explains its superior photocatalytic activity compared with pristine  $\text{SrTaO}_2\text{N}$ .

Table S1. The moles of photon flux per hour gauged by a quantum meter (Apogee MP-300) and photocatalytic oxygen production rate of  $\text{Sr}_4\text{Ta}_2\text{O}_{9-x}\text{N}_y$  under monochromic light illumination.

| $\lambda$ /nm | Flux / $\mu\text{mol}\cdot\text{h}^{-1}$ | $\text{O}_2$ evolution / $\mu\text{mol}\cdot\text{h}^{-1}$ |
|---------------|------------------------------------------|------------------------------------------------------------|
| $600 \pm 40$  | 2895                                     | 1.41                                                       |
| $550 \pm 35$  | 2447                                     | 3.06                                                       |
| $500 \pm 35$  | 1925                                     | 5.21                                                       |
| $450 \pm 35$  | 1255                                     | 8.05                                                       |
| $420 \pm 20$  | 1147                                     | 9.82                                                       |

Table S2. Contact angle, Zeta-potential, and the refined cationic composition

| Samples                                                         | Contact angle (degree) | Zeta-potential (mV) | the refined ratio Sr/Ta |
|-----------------------------------------------------------------|------------------------|---------------------|-------------------------|
| Sr <sub>4</sub> Ta <sub>2</sub> O <sub>9-x</sub> N <sub>y</sub> | 7                      | -14.9               | 1.97                    |
| SrTaO <sub>2</sub> N                                            | 25                     | -10.0               | 1.01                    |

Table S3. The binding energy (BE) and full width at half maximum (FWHM) of Ta 4f<sub>7/2</sub> and 4f<sub>5/2</sub> by peak-fitting XPS spectra

| Samples                                        | Ta 4f <sub>5/2</sub> |             | Ta 4f <sub>7/2</sub> |             |
|------------------------------------------------|----------------------|-------------|----------------------|-------------|
|                                                | BE (eV)              | FWHM (eV)   | BE (eV)              | FWHM (eV)   |
| Sr <sub>4</sub> Ta <sub>2</sub> O <sub>9</sub> | 25.28                | 1.54        | 27.15                | 1.49        |
| 1173 K 5h                                      | 25.2                 | 1.67        | 27.12                | 1.62        |
| 1273 K 5h                                      | 25.34                | 1.53        | 27.24                | 1.49        |
| 1273 K 10h                                     | 25.28                | 1.50        | 27.15                | 1.48        |
| 1273 K 15h                                     | 25.23                | 1.52        | 27.22                | 1.47        |
| 1373 K 5h                                      | 24.29 / 25.32        | 1.30 / 1.39 | 26.21 / 27.16        | 1.11 / 1.35 |
| SrTaO <sub>2</sub> N                           | 24.53 / 25.53        | 1.48 / 1.28 | 26.48 / 27.37        | 1.20 / 1.23 |

## References

1. B. H. Meekins and P. V. Kamat, *ACS Nano*, 2009, **3**, 3437-3446.
2. A. Zaban, M. Greenshtein and J. Bisquert, *ChemPhysChem*, 2003, **4**, 859-864.
